# Supplementary material for: Determination of Ag+ ions by a graphene oxide based dual-output nanosensor with high selectivity
Source: Royal Society of Chemistry journal article supplement (doi:10.1039/c6ra00048g), 2016-01-01
Supplement: c6ra00048g1.pdf [file c6ra00048g1.pdf]

## Supplementary Information

### Determination of Ag<sup>+</sup> ion by a graphene oxide based dual-output nanosensor with high selectivity

Rumei Cheng<sup>a,†</sup>, Lingli Li<sup>a,†</sup>, Shengju Ou<sup>b</sup>, Yexu Bu<sup>a</sup>, Congcong Ge<sup>a</sup>, Liming Dai<sup>a,c,\*</sup>, Yuhua Xue<sup>a,\*</sup>

<sup>a</sup>Institute of Advanced Materials for Nano-Bio Applications, School of Ophthalmology & Optometry, Wenzhou Medical University, Wenzhou, Zhejiang 325027, China, Emails: yuhua\_xue@hotmail.com

<sup>b</sup>Nanjing Landa Femtosecond Inspection Technology Co. Ltd., Nanjing High-tech Industry Development Zone, Nanjing, Jiangsu 210032, China

<sup>c</sup>Center of Advanced Science and Engineering for Carbon (Case4Carbon), Department of Macromolecular Science and Engineering, Case Western Reserve University, 10900 Euclid Avenue, Cleveland, Ohio 44106, United States

Emails: lxd115@case.edu

<sup>†</sup>Lingli Li and Rumei Cheng contributed equally to this work

#### Experimental section

##### Reagents and apparatus

All reagents used were analytical grade. 1, 8-diaminonaphthalene (DAN) was purchased from Sigma. All other reagents were obtained from Shanghai Reagents Company. The deionized water collected from the Millipore purification system was used to prepare these cationic solutions. Atomic force microscope (AFM) image of the GAP was observed using a SPI3800N microscope operating in the contact mode. X-ray photoelectron spectroscopy (XPS) was performed on ESCALB MK-II spectrometer. Fourier transform infrared spectra (FTIR) were recorded on a PE Spectrum One spectrometer with KBr pellets. UV-vis spectra were measured on Perkin Elmer Lambda 35 Spectrometer. Raman spectra were recorded with a Renishaw 2000 equipped by an Ar<sup>+</sup> ion laser giving the excitation line of 514.5 nm and an air-cooling charge-coupled device as the detector. X-ray diffraction (XRD) measurements were carried out on a Rigaku D/max 2550V instrument with Cu K $\alpha$  radiation ( $\lambda$ = 1.5406 Å). Fluorescence emission spectra were obtained using AB-series2 luminescence spectrometer.

##### Preparation of GAP compound

GO was prepared from graphite powder according to the Hummer's method,<sup>1</sup> through the acid-oxidation exfoliation, followed by filtration and vacuum drying. Compound GAP was synthesized according to method that our group reported previously.<sup>2</sup> The resultant GO (16 mg) was dissolved in 20 mL distilled water under ultrasonication for 1h. 20  $\mu$ L N-hydroxysuccinimide (NHS, 1.0 mM) and 20  $\mu$ L of N-(3-dimethylaminopropyl)-N'-ethylcarbodiimide (EDC, 1.0 mM) solutions were added to the GO dispersion subsequently. After 10 min, 10 mL ethanol solution of DAN solution (2 mg/mL) was added. The resulting mixture solution was heated up to 50°C for 2 h, followed by magnetic stirring for 12 h at room temperature. Upon filtration, the GAP was separated and washed by ethanol for subsequent characterization.

##### Selectivity of Ag<sup>+</sup> induced fluorescence in the presence of other metal ions.

The selectivity of GAP for  $\text{Ag}^+$  against a background of various alkali, alkaline earth, and transition metal ions was investigated by using fluorescence spectroscopy. Aqueous metal ion solutions of  $\text{Ag(I)}$ ,  $\text{Na(I)}$ ,  $\text{K(I)}$ ,  $\text{Ca(II)}$ ,  $\text{Mg(II)}$ ,  $\text{Cr(III)}$ ,  $\text{Mn(II)}$ ,  $\text{Fe(II)}$ ,  $\text{Co(II)}$ ,  $\text{Ni(II)}$ ,  $\text{Cu(II)}$ ,  $\text{Zn(II)}$ ,  $\text{Fe(III)}$ ,  $\text{Al(III)}$ , and  $\text{Cd(II)}$  (perchlorate or nitrate salts) were freshly prepared before use.

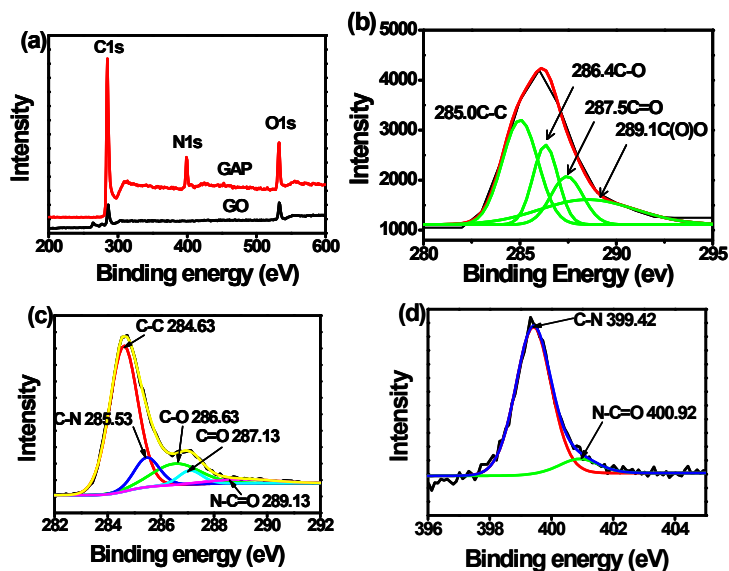

Fig. S1. XPS spectra of the GO and GAP. (a) XPS survey spectra of the GO and GAP; (b) C1s peak of GO; (c) C1s peak of GAP; (d) N1s peak of GAP.

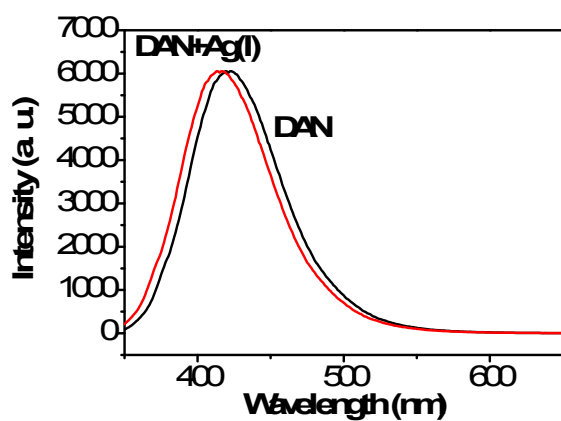

Fig. S2. Fluorescence spectra of DAN (black line) and DAN+ $\text{Ag(I)}$  (red line). The concentrations of DAN and  $\text{Ag(I)}$  are 2 mg/L and 10 mg/L, respectively.

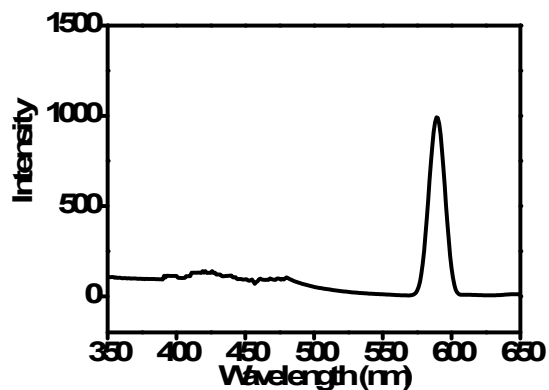

Fig. S3. Fluorescence spectrum of GO and DAN mixture (excitation at 293 nm ). The concentrations are 2mg/L.

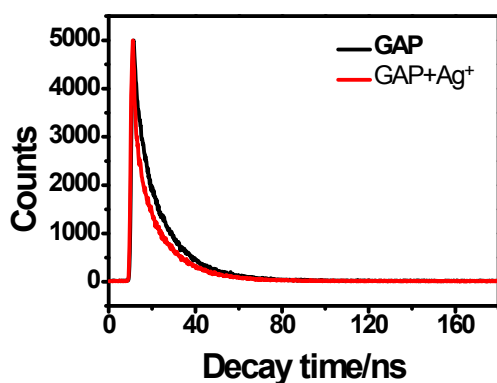

Fig. S4. Life time of GAP and GAP+Ag(I) in solutions. The concentrations of GAP and Ag(I) are 2 mg/L and 5mg/L, respectively.

Table S1. XPS signals and the respective relative atomic percentages of GO and GAP.

| Element     | GO                  |                            | GAP                 |                            |
|-------------|---------------------|----------------------------|---------------------|----------------------------|
|             | Binding Energy (eV) | Relative Atomic Percentage | Binding Energy (eV) | Relative Atomic Percentage |
| C1s (C-C)   | 285.0               |                            | 284.63              |                            |
| C1s (C-O)   | 286.4               |                            | 286.63              |                            |
| C1s (C=O)   | 287.5               | 65.21%                     | 287.13              | 82.77%                     |
| C1s (C(O)O) | 289.1               |                            | not found           |                            |
| C1s (C-N)   | not found           |                            | 285.53              |                            |
| N1s (N-C)   | not found           |                            | 399.42              | 7.96%                      |
| N1s (N-C=O) | not found           | 0%                         | 400.92              |                            |
| O1s         | 532.4               | 34.79%                     | 530.13              | 9.27%                      |

## Reference

- 1 W. S. Jr. Hummers and R. E. Offeman, *J. Am. Chem. Soc.*, 1958, 80, 1339.
- 2 R. Cheng, Y. Liu, S. Ou, Y. Pan, S. Zhang, H. Chen, L. Dai and J. Qu, *Anal. Chem.*, 2012, 84, 5641.
